# Supplementary material
Source: PubMed Central journal article supplement (PMC4306536)
Supplement: shk-43-192-s002.pdf [file shk-43-192-s002.pdf]

## Supplemental Digital Content 2

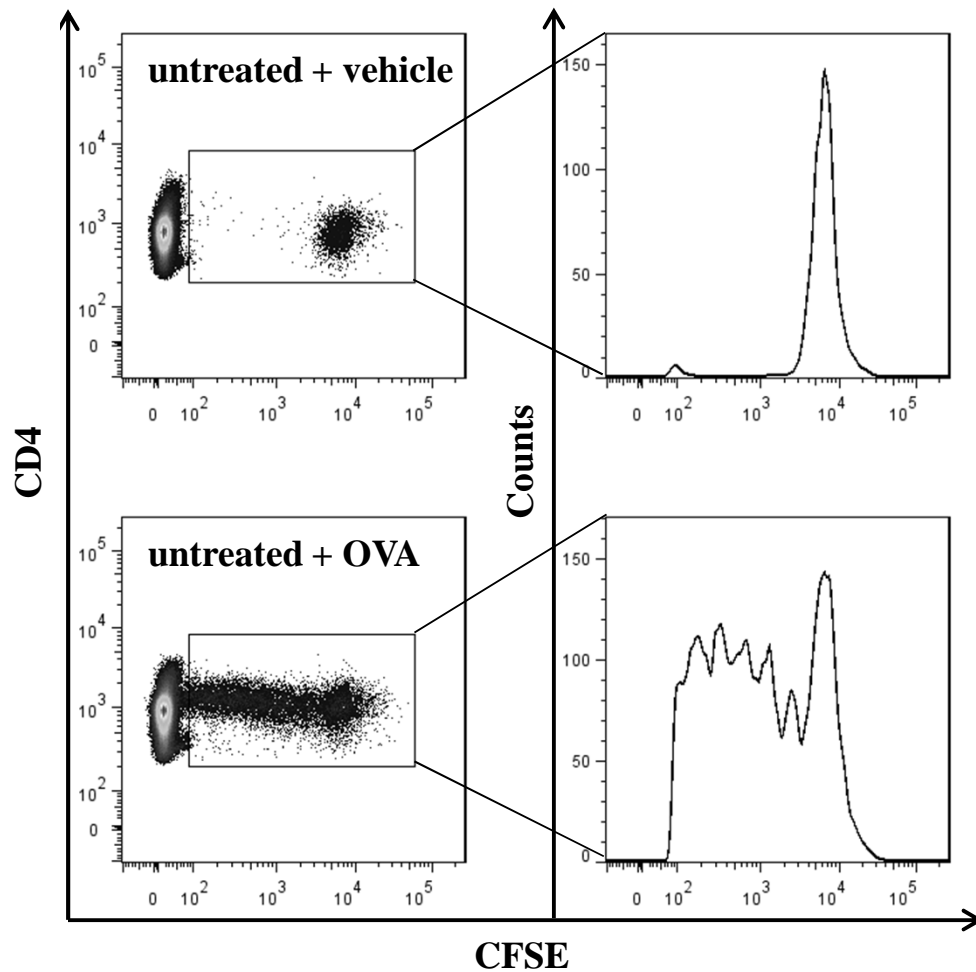

***Transferred OTII CD4<sup>+</sup> T cells only proliferate in the presence of specific antigen.***

OTII transgenic CD4<sup>+</sup> T cells were CFSE labelled and adoptively transferred into C57BL/6 WT mice (non-septic). 24 h later, mice received 200 µg of OVA or the same volume of vehicle (NaCl) intra-peritoneally. Three days after this, proliferation of transferred CD4<sup>+</sup> CFSE<sup>+</sup> T cells was determined by flow cytometry via CFSE fluorescence. One representative result for each group is shown. Sample size was 7 - 9.
