# Supplementary material
Source: PubMed Central journal article supplement (PMC4306536)
Supplement: shk-43-192-s003.pdf [file shk-43-192-s003.pdf]

## Supplemental Digital Content 3

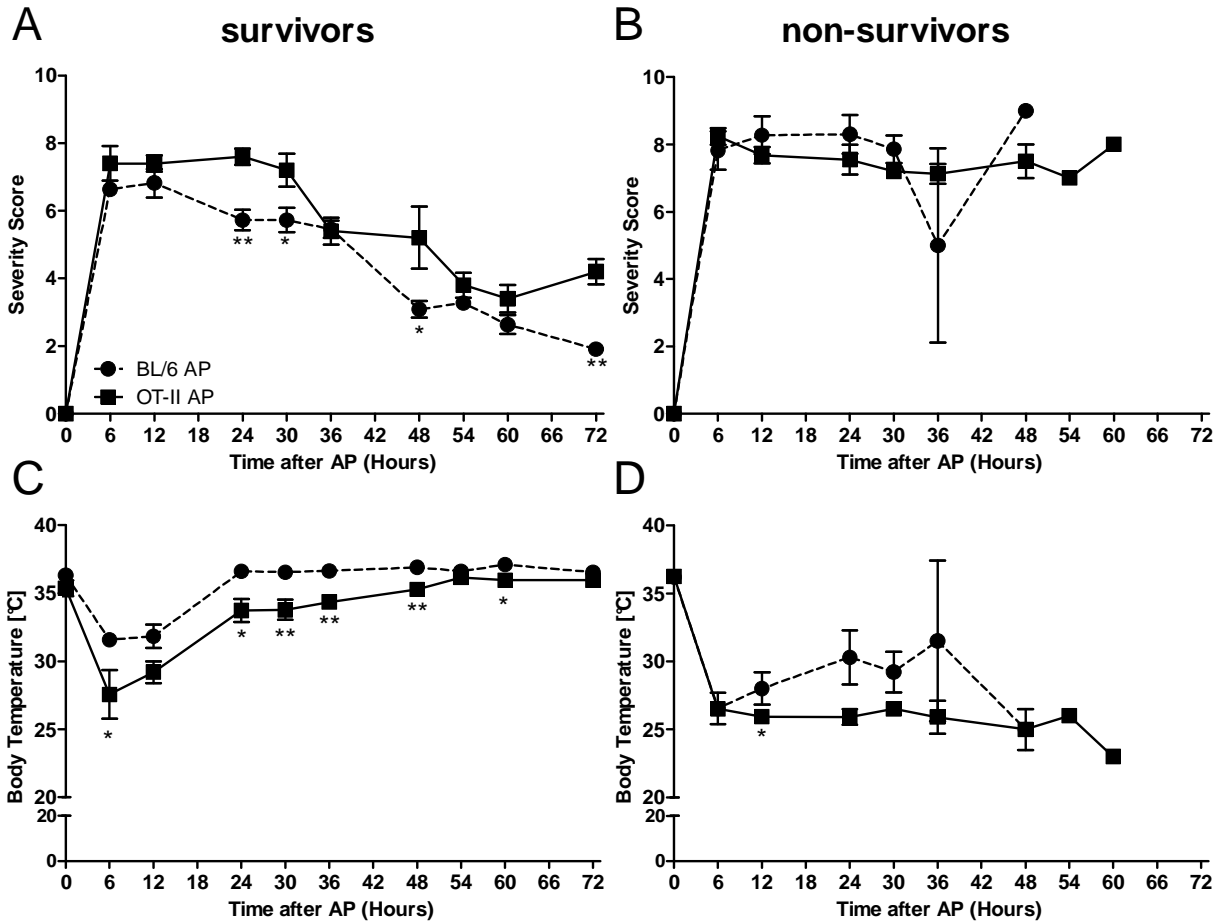

### ***Prolonged recovery phase in septic OTII mice compared to WT.***

OTII mice and C57BL/6 WT mice were subjected to AP or left untreated. Body temperature was measured at close intervals and is depicted separately for surviving (A) and non-surviving (B) mice. Additionally, sepsis severity was determined as described in Materials and Methods. It is shown separately for surviving (C) and non-surviving (D) mice, respectively. Sample sizes were 11 WT, 4 OTII/group for surviving and 11 WT, 26 OTII/group for non-surviving animals. Data are expressed as the mean  $\pm$  SEM. Septic OTII and WT mice were compared using the Mann-Whitney test. \*,  $P \leq 0.05$ ; \*\*,  $P \leq 0.01$
